# Supplementary figures and images for: Measuring S-Phase Duration from Asynchronous Cells Using Dual EdU-BrdU Pulse-Chase Labeling Flow Cytometry
Source: MDPI journal article supplement (doi:10.3390/genes13030408), 2022-02-24

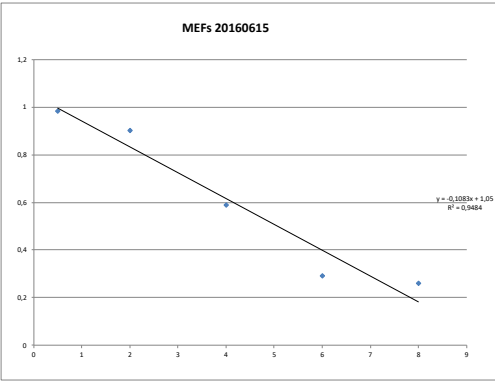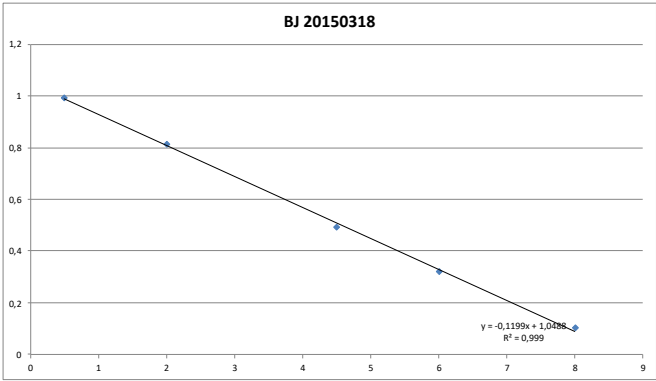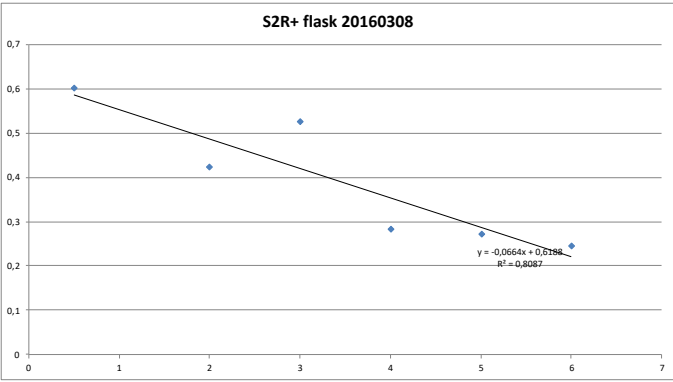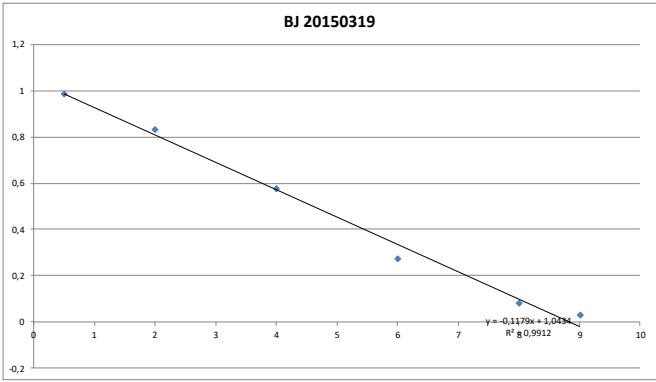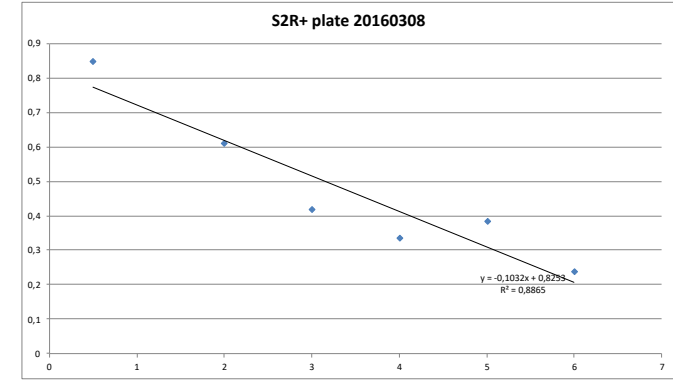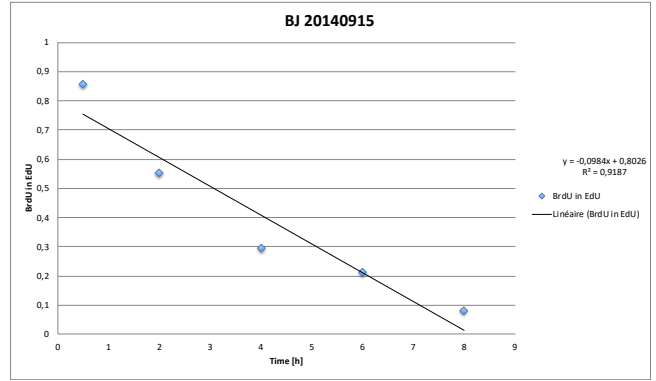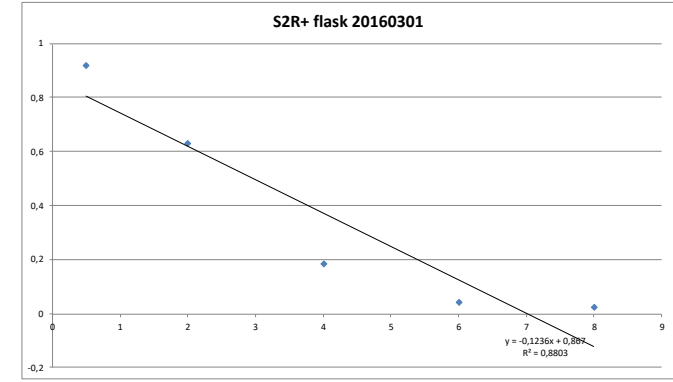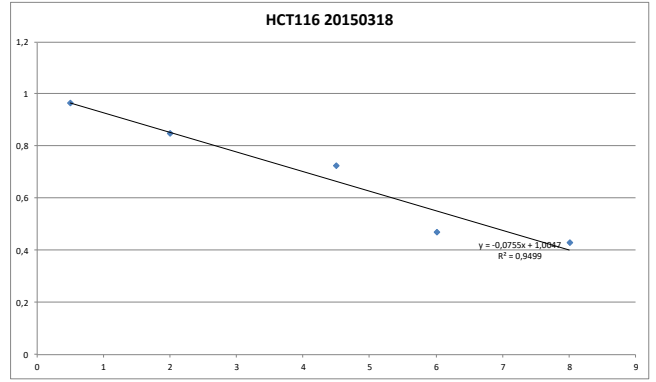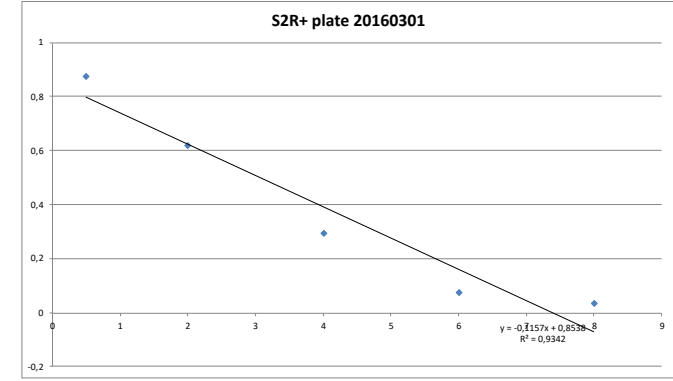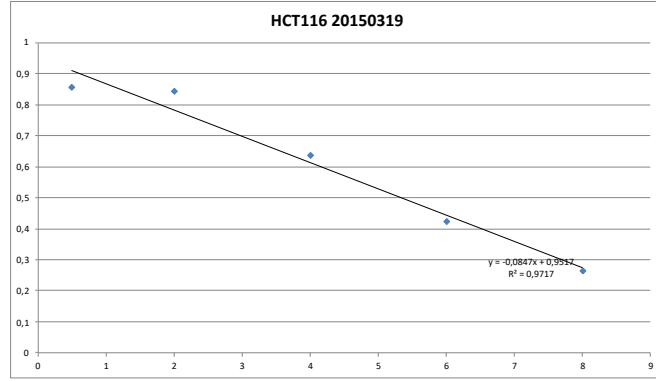

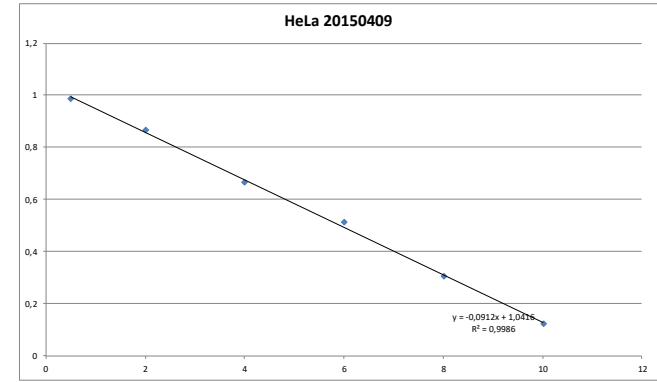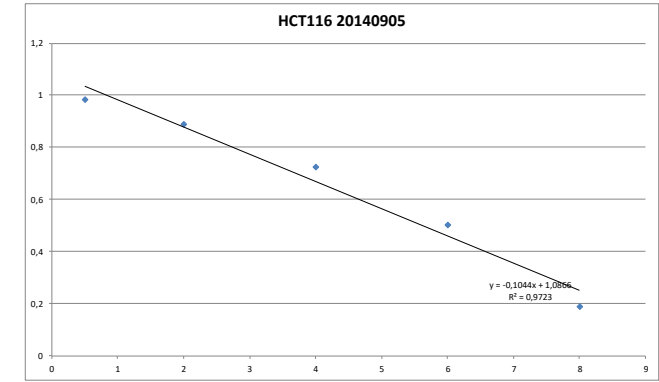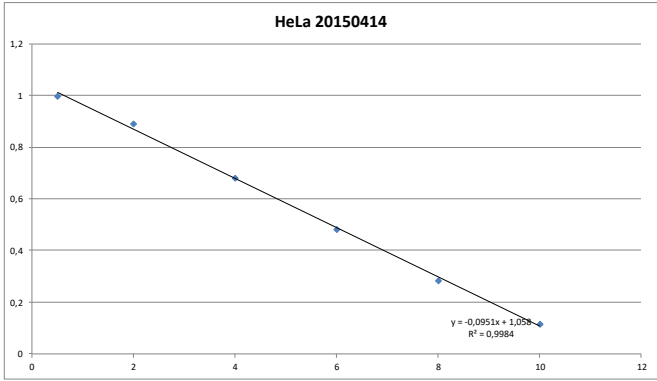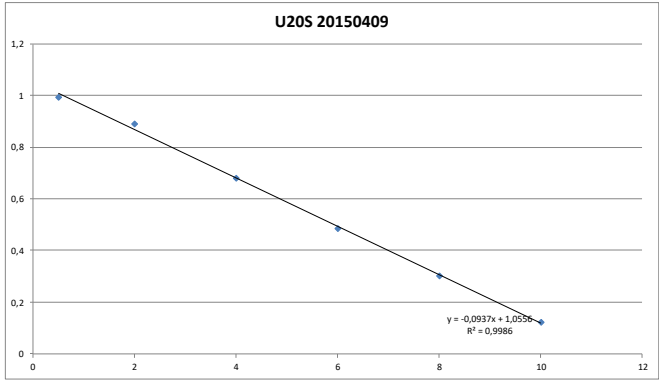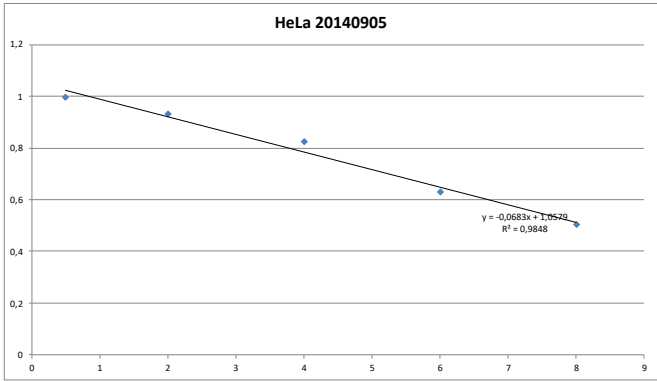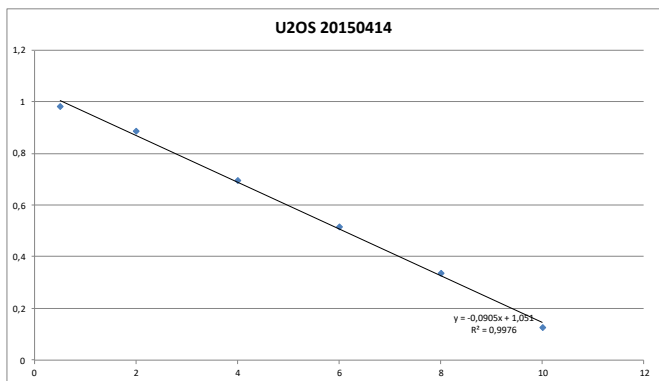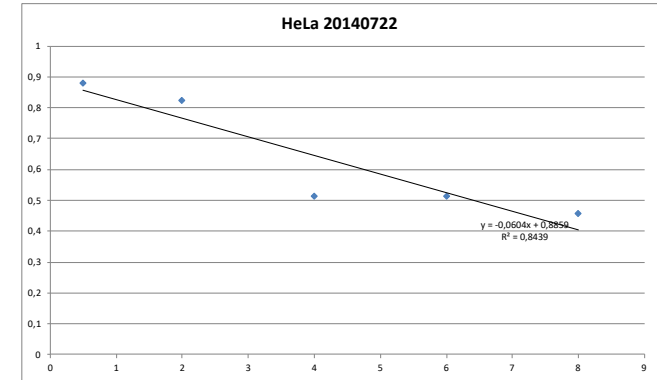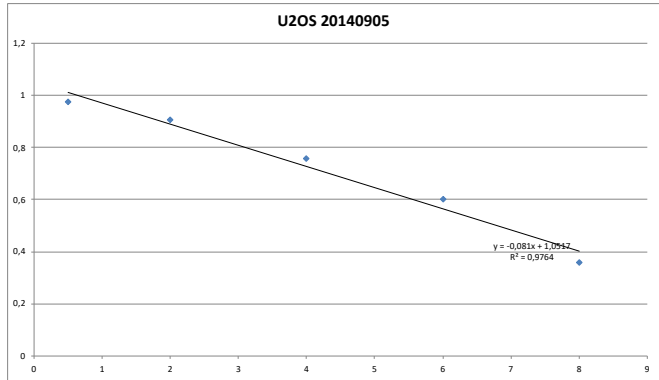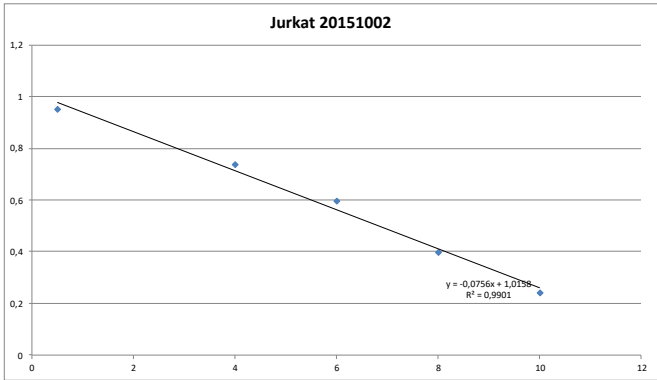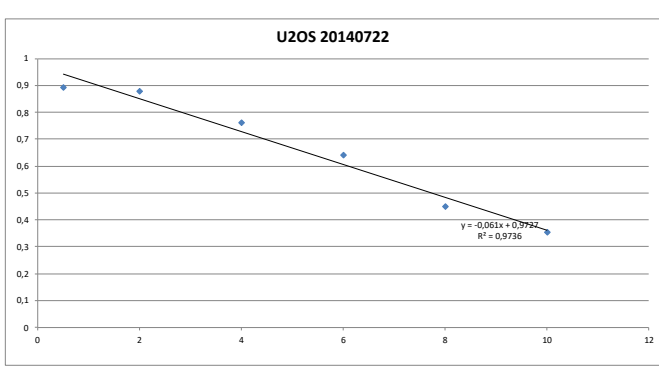

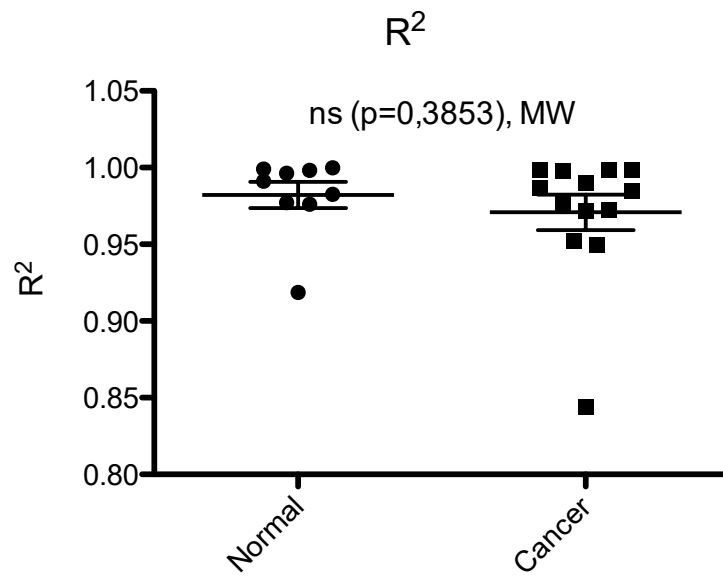

Bialic et al., SuppFigure S1

Supplement: s1 [file s1]
